# Supplementary material for: Validating Field Regeneration Capacity for Selected Accessions of Gossypium hirsutum Using Callus Induction and Regeneration Capacity
Source: Research Square preprint supplement (doi:10.21203/rs.3.rs-1033769/v1), 2021-11-09
Supplement: Supplementary file 1 [file 8cc72cdb20f3488182181a82.docx]

Supplementary Table 1: Correlation analysis of callus induction data and field phenotypic regeneration levels.

| Correlation | Hypocotyl CI | Cotyledon CI | Shoot_tip CI | Hypocotyl RR | Hypocotyl SR | Cotyledon RR | Cotyledon SR | Shoot_tip RR | Shoot_tip SR | Little NB | Medium NB |
| --- | --- | --- | --- | --- | --- | --- | --- | --- | --- | --- | --- |
| Cotyledon CI | 0.92** |  |  |  |  |  |  |  |  |  |  |
| Shoot_tip CI | -0.14 | 0.01 |  |  |  |  |  |  |  |  |  |
| Hypocotyl RR | 0.16 | 0.21 | -0.08 |  |  |  |  |  |  |  |  |
| Hypocotyl SR | 0.60 ** | 0.48** | -0.28 | 0.18 |  |  |  |  |  |  |  |
| Cotyledon RR | 0.35* | 0.28 | -0.13 | 0.25 | 0.52** |  |  |  |  |  |  |
| Cotyledon SR | 0.34* | 0.44** | 0.02 | 0.42* | 0.13 | 0.09 |  |  |  |  |  |
| Shoot_tip RR | 0.18 | 0.30 | 0.50** | -0.08 | -0.05 | -0.04 | 0.20 |  |  |  |  |
| Shoot_tip SR | 0.20 | 0.29 | 0.55** | 0.13 | 0.22 | -0.02 | 0.15 | 0.15 |  |  |  |
| Little NB | 0.12 | 0.08 | -0.16 | 0.08 | 0.02 | -0.11 | -0.09 | -0.29 | 0.09 |  |  |
| Medium NB | 0.19 | 0.21 | 0.24 | 0.20 | 0.24 | 0.13 | 0.09 | 0.06 | 0.38* | 0.02 |  |
| Plenty NB | -0.17 | -0.21 | 0.21 | -0.08 | 0.14 | 0.10 | -0.09 | 0.16 | 0.10 | -0.10 | 0.27 |

Note: CI:
